# Supplementary material for: A high-throughput neurohistological pipeline for brain-wide mesoscale connectivity mapping of the common marmoset
Source: eLife. 2019 Feb 5;8:e40042. doi: 10.7554/eLife.40042 (PMC6384052; doi:10.7554/eLife.40042)
Supplement: Supplementary file 1. [file elife-40042-supp1.xlsx]

## Sheet: Sheet1
	TextID		Year	Title
ID		Author
1	A85	Aggleton, JP	1985	A description of intra-amygdaloid connections in old world monkeys
2	A86	Aggleton, JP	1986	A description of the amygdalo-hippocampal interconnections in the macaque monkey
3	AAC85	Andersen, RA et al.	1985	Callosal and prefrontal associational projecting cell populations in area 7A of the macaque monkey: a study using retrogradely transported fluorescent dyes.
4	AAES90	Andersen, RA et al.	1990	Cortico-cortical connections of anatomically and physiologically defined subdivisions within the inferior parietal lobule.
5	AB89	Amaral, DG et al.	1989	Cholinergic innervation of the monkey amygdala: An immunohistochemical analysis with antisera to choline acetyltransferase
6	ABMR98	Anderson, JC et al.	1998	The connection from cortical area V1 to V5: A light and electron microscopic study
7	ABP80	Aggleton, JP et al.	1980	Cortical and subcortical afferents to the amygdala of the rhesus monkey (Macaca mulatta)
8	AC80	Amaral, DG et al.	1980	Subcortical afferents to the hippocampal formation in the monkey
9	AF42	Ades, HW et al.	1942	The acoustic area of the monkey (Macaca mulatta)
10	AF45	Ades, HW et al.	1945	The acoustic projection system: A comparative study
11	AHGWU00	Adams, MM et al.	2000	Visual cortical projections and chemoarchitecture of macaque monkey pulvinar
12	AI92	Amaral, DG et al.	1992	Retrograde transport of D-[3H]-aspartate injected into the monkey amygdaloid complex
13	AIC84	Amaral, DG et al.	1984	The commissural connections of the monkey hippocampal formation
14	AIC87	Amaral, DG et al.	1987	The entorhinal cortex of the monkey: I. Cytoarchitectonic organization
15	AM02	Anderson, JC et al.	2002	Connection from cortical area V2 to MT in macaque monkey
16	AM84	Aggleton, JP et al.	1984	Projections to the thalamus in the cynomolgus monkey
17	AOO00	Abel, PL et al.	2000	Organization of callosal linkages in visual area V2 of macaque monkey.
18	AP34	Aronson, LR et al.	1934	Thalamic nuclei of the Pithecus (Macacus) Rhesus, part II. dorsal thalamus
19	AP84	Amaral, DG et al.	1984	Amygdalo-cortical projections in the monkey (Macaca fascicularis)
20	APA83	Avendano, C et al.	1983	Evidence for an amygdaloid projection to premotor cortex but not to motor cortex in the monkey
21	APPC92	Amaral, DG et al.	1992	Anatomical organization of the primate amygdaloid complex
22	ASM94	Arikuni, T et al.	1994	Ipsilateral connections of the anterior cingulate cortex with the frontal and medial temporal cortices in the macaque
23	AVS05	Aggleton, JP et al.	2005	"Projections from the hippocampal region to the mammillary bodies in macaque monkeys."
24	B00	Bonda, E	2000	Organization of connections of the basal and accessory basal nuclei in the monkey amygdala
25	B05	Brodmann, K	1905	Beiträge zur histologischen Lokalisation der Grosshirnrinde. III. Die Rindenfelder der niederen Affen
26	B09	Brodmann, K	1909	Vergleichende Lokalisationslehre der Grosshirnrinde
27	B81	Bender, DB	1981	Retinotopic organization of macaque pulvinar
28	B84	Burton, H	1984	Corticothalamic connections from the second somatosensory area and neighboring regions in the latreal sulcus of macaque monkeys
29	B88	Barbas, H	1988	Anatomic organization of basoventral and mediodorsal visual recipient prefrontal regions in the rhesus monkey.
30	B92	Barbas, H	1992	Architecture and cortical connections of the prefrontal cortex in the Rhesus monkey
31	BAS90	Blatt, GJ et al.	1990	Visual receptive field organization and corticocortical connections of the lateral intraparietal area (area LIP) in the macaque.
32	BB47	von Bonin, G et al.	1947	The Neocortex of Macaca Mulatta
33	BB95	Barbas, H et al.	1995	Topographically specific hippocampal projections target functionally distinct prefrontal areas in the rhesus monkey
34	BBCGMRal08	Borra, E et al.	2008	Cortical connections of the macaque anterior intraparietal (AIP) area.
35	BD77	Benevento, LA et al.	1977	Topographical projections of the prestriate cortex to the pulvinar nuclei in the macaque monkey: an autoradiographic study
36	BD90	Barbas, H et al.	1990	Projections from the amygdala to basoventral and mediodorsal prefrontal regions in the rhesus monkey
37	BDG81	Bruce, C et al.	1981	Visual properties of neurons in a polysensory area in superior temporal sulcus of the macaque.
38	BDU91	Boussaoud, D et al.	1991	Visual topography of area TEO in the macaque
39	BF95	Burton, H et al.	1995	Ipsilateral intracortical connections of physiologically defined cutaneous representations in areas 3b and 1 of macaque monkeys: projections in the vicinity of the central sulcus.
40	BFA95	Burton, H et al.	1995	Cortical areas within the lateral sulcus connected to cutaneous representations in areas 3b and 1: A revised interpretation of the second somatosensory area in macaque monkeys
41	BFNV86	Burkhalter, A et al.	1986	Anatomical and physiological asymmetries related to visual areas V3 and VP in macaque extrastriate cortex.
42	BG93	Bates, JF et al.	1993	Prefrontal connections of medial motor areas in the rhesus monkey
43	BGDR99	Barbas, H et al.	1999	Medial prefrontal cortices are unified by common connections with superior temporal cortices and distinguished by input from memory-related areas in the rhesus monkey
44	BGSB85	Bruce, CJ et al.	1985	Primate frontal eye fields: II. Physiological and anatomical correlates of electrically evoked eye movements
45	BHD91	Barbas, H et al.	1991	Diverse thalamic projections to the prefrontal cortex in the Rhesus monkey
46	BHSDS05	Barbas, H et al.	2005	"Parallel organization of contralateral and ipsilateral prefrontal cortical projections in the rhesus monkey"
47	BJ76	Burton, H et al.	1976	The posterior thalamic region and its cortical projection in New World and Old World monkeys
48	BK83	Bullier, J et al.	1983	Projection of the lateral geniculate nucleus onto cortical area V2 in the macaque monkey
49	BK98	Beck, PD et al.	1998	Thalamic connections of the dorsomedial visual area in primates
50	BK99	Beck, PD et al.	1999	Cortical connections of the dorsomedial visual area in Old World macaque monkeys
51	BM85	Barbas, H et al.	1985	Cortical afferent input to the principalis region of the rhesus monkey
52	BMLU97	Bachevalier, J et al.	1997	Thalamic and temporal cortex input to medial prefrontal cortex in rhesus monkeys
53	BP82	Barbas, H et al.	1982	Cytoarchitecture and intrinsic connections of the prefrontal cortex of the rhesus monkey.
54	BP87	Barbas, H et al.	1987	Architecture and frontal cortical connections of the premotor cortex (area 6) in the rhesus monkey
55	BP89	Barbas, H et al.	1989	Architecture and connections of prefrontal cortex
56	BP92	Barnes, CL et al.	1992	Efferent cortical connections of multimodal cortex of the superior temporal sulcus in the rhesus monkey
57	BPMV08	Buckwalter, J et al.	2008	Thalamic projections to the posteromedial cortex in the macaque
58	BPR03	Blatt, GJ et al.	2003	Parcellation of cortical afferents to three distinct sectors in the parahippocampal gyrus of the rhesus monkey: An anatomical and neurophysiological study
59	BR75	Benevento, LA et al.	1975	Extrageniculate projections to layers VI and I of striate cortex (area 17) in the rhesus monkey (Macaca mulatta)
60	BR76	Benevento, LA et al.	1976	The cortical projections of the inferior pulvinar and adjacent lateral pulvinar in the Rhesus monkey (Macaca mulatta): An autoradiographic study
61	BR98	Blatt, GJ et al.	1998	Organization of direct hippocampal efferent projections to the cerebral cortex of the rhesus monkey: Projections from CA1, prosubiculum, and subiculum to the temporal lobe
62	BS83	Benevento, LA et al.	1983	The organization of projections of the retinorecipient and nonretinorecipient Nuclei of the pretectal complex and layers of the superior colliculus to the lateral pulvinar and medial pulvinar in the macaque monkey
63	BSM96	Bullier, J et al.	1996	Functional streams in occipito-frontal connections in the monkey
64	BSV08	Buckwalter, J et al.	2008	Evidence for direct projections from the basal nucleus of the amygdala to retrosplenial cortex in the Macaque monkey
65	BTWR05	Boussaoud, D et al.	2005	Callosal connections of dorsal versus ventral premotor areas in the macaque monkey: a multiple retrograde tracing study
66	BUD90	Boussaoud, D et al.	1990	Pathways for motion analysis: cortical connections of the medial superior temporal and fundus of the superior temporal visual areas in the macaque.
67	BWKK08	Bezgin, G et al.	2008	Deducing logical relationships between spatially registered cortical parcellations under conditions of uncertainty
68	C34	Crouch, RL	1934	The nuclear configuration of the thalamus of Macacus Rhesus
69	CCHR95	Cavada, C et al.	1995	Acetylcholinesterase histochemistry in the macaque thalamus reveals territories selectively connected to frontal, parietal and temporal association cortex
70	CCTCR00	Cavada, C et al.	2000	The anatomical connections of the macaque monkey orbitofrontal cortex
71	CDG93	Colby, CL et al.	1993	Ventral Intraparietal Area of the Macaque: Anatomic Location and Visual Response Properties
72	CG85	Cavada, C et al.	1985	Parieto-prefrontal connections in the monkey: Topographic distribution within the prefrontal cortex of sectors connected with the lateral and medial parietal cortex
73	CG89a	Cavada, C et al.	1989	Posterior parietal cortex in Rhesus monkey: I. Parcellation of areas based on distinctive limbic and sensory corticocortical connections
74	CG89b	Cavada, C et al.	1989	Posterior parietal cortex in Rhesus monkey: II. Evidence for segregated corticocortical networks linking sensory and limbic areas with the frontal lobe.
75	CGG82	Covey, E et al.	1982	A new visual area in the parieto-occipital sulcus of the macaque.
76	CGMBOFal99	Caminiti, R et al.	1999	Early coding of reaching: frontal and parietal association connections of parieto-occipital cortex
77	CGOG83	Colby, CL et al.	1983	Cortical afferents to visual area PO in the macaque.
78	CGOG88	Colby, CL et al.	1988	Topographic organization of cortical visual afferents to extrastriate visual area PO in the Macaque: A dual tracer study.
79	CMH07	Calzavara, R et al.	2007	Relationship between the corticostriatal terminals from areas 9 and 46, and those from area 8A, dorsal and rostral premotor cortex and area 24c: an anatomical substrate for cognition to action.
80	CP89	Cippolloni, PB et al.	1989	Connectional analysis of the ipsilateral and contralateral afferent neurons of the superior temporal region in the rhesus monkey.
81	CP94	Carmichael, ST et al.	1994	Architectonic subdivision of the orbital and medial prefrontal cortex in the macaque monkey
82	CP95a	Carmichael, ST et al.	1995	Limbic connections of the orbital and medial prefrontal cortex in Macaque monkeys
83	CP95b	Carmichael, ST et al.	1995	Sensory and premotor connections of the orbital and medial prefrontal cortex
84	CP96	Carmichael, ST et al.	1996	Connectional networks within the orbital and medial prefrontal cortex of Macaque monkeys
85	CP99	Cippolloni, PB et al.	1999	Cortical connections of the frontoparietal opercular areas in the rhesus monkey.
86	CSCG95	Cusick, CG et al.	1995	Chemoarchitectonics and corticocortical terminations within the superior temporal sulcus of the rhesus monkey: evidence for subdivisions of superior temporal polysensory cortex
87	CSDW93	Cusick, CG et al.	1993	Chemoarchitectonic Subdivisions of the Visual Pulvinar in Monkeys and Their Connectional Relations With the Middle Temporal and Rostral Dorsolateral Visual Areas, MT and DLr
88	CST97	Cheng, K et al.	1997	Organization of corticostriatal and corticoamygdalar projections arising from the anterior inferotemporal area TE of the macaque monkey: a Phaseolus vulgaris leucoagglutinin study
89	DBDU93	Distler, C et al.	1993	Cortical connections of inferior temporal area TEO in macaque monkeys
90	DCG98	Duhamel, J et al.	1998	Ventral Intraparietal Area of the Macaque: Congruent Visual and Somatic Response Properties
91	DD93	Darian-Smith, C et al.	1993	Thalamic projections to areas 3a, 3b, and 4 in the sensorimotor cortex of the mature and infant macaque monkey
92	DDBR93	Darian-Smith, C et al.	1993	Ipsilateral cortical projections to areas 3a, 3b, and 4 in the macaque monkey
93	DDC90	Darian-Smith, C et al.	1990	Thalamic Projections to Sensorimotor Cortex in the Macaque Monkey: Use of Multiple Retrograde Fluorescent Tracers
94	DLRPK03	Disbrow, E et al.	2003	Cortical connections of the second somatosensory area and the parietal ventral area in macaque monkeys.
95	DRV85	Demeter, S et al.	1985	Interhemispheric pathways of the hippocampal formation, presubiculum, and entorhinal and posterior parahippocampal cortices in the rhesus monkey: The structure and organization of the hippocampal commissures
96	DS91	Dum, RP et al.	1991	The origin of corticospinal projections from the premotor areas in the frontal lobe
97	DS93	Dum, RP et al.	1993	Cingulate Motor Areas
98	DU86	Desimone, R et al.	1986	Multiple visual areas in the caudal superior temporal sulcus of the macaque
99	FAG85	Fenstemaker, SB et al.	1985	Organization and neuronal properties of visual area TEO.
100	FBV97	Felleman, DJ et al.	1997	Cortical connections of area V3 and VP of macaque monkey extrastriate visual cortex
101	FH02	Fudge, JL et al.	2002	"Defining the Caudal Ventral Striatum in Primates: Cellular and Histochemical Features"
102	FJ81	Friedman, DP et al.	1981	Thalamic input to areas 3a and 2 in monkeys
103	FJB80	Friedman, DP et al.	1980	Representation pattern in the second somatic sensory area of the monkey cerebral cortex
104	FLH06	Frankle, WG et al.	2006	"Prefrontal Cortical Projections to the Midbrain in Primates: Evidence for a Sparse Connection"
105	FM86	Friedman, DP et al.	1986	Thalamic connectivity of the second somatosensory area and neighboring somatosensory fields of the lateral sulcus of the macaque.
106	FMOM86	Friedman, DP et al.	1986	Cortical connections of the somatosensory fields of the lateral sulcus of macaques: evidence for a corticolimbic pathway for touch.
107	FÖAP00	Ferry, AT et al.	2000	Prefrontal cortical projections to the striatum in macaque monkeys: Evidence for an organization related to prefrontal networks
108	FSAG86	Fenstemaker, SB et al.	1986	A comparison of subcortical afferents to visual cortical areas V4, TEO and IT in the macaque.
109	FV87	Felleman, DJ et al.	1987	Receptive field properties of neurons in area V3 of macaque monkey extrastriate cortex.
110	FV91	Felleman, DJ et al.	1991	Distributed hierarchical processing in the primate cerebral cortex
111	FXM97	Felleman, DJ et al.	1997	Modular Organisation of Occipito-Temporal Pathways: Cortical Connections between Visual Area 4 and Visual Area 2 and Posterior Inferotemporal Ventral Area in Macaque Monkeys
112	FYP96	Francois, C et al.	1996	"A stereotaxic atlas of the basal ganglia in Macaques"
113	G82	Graham, J	1982	Some topographical connections of the striate cortex with subcortical structures in Macaca fascicularis
114	G89	Gower, EC	1989	Efferent projections from limbic cortex of the temporal pole to the magnocellular medial dorsal nucleus in the rhesus monkey.
115	GBBRL07	Gerbella, M et al.	2007	Multimodal architectonic subdivision of the caudal ventrolateral prefrontal cortex of the macaque monkey.
116	GBBRL09	Gerbella, M et al.	2009	Cortical Connections of the Macaque Caudal Ventrolateral Prefrontal Areas 45A and 45B
117	GBP87	Ghosh, S et al.	1987	A quantitative study of the distribution of neurons projecting to the precentral motor cortex in the monkey (M. fascicularis).
118	GC97	Gutierrez, C et al.	1997	Area V1 in macaque monkeys projects to multiple histochemically defined subdivisions of the inferior pulvinar complex
119	GCSC00	Gutierrez, C et al.	2000	Neurochemical and connectional organization of the dorsal pulvinar complex in monkeys
120	GFBSZ96	Galletti, C et al.	1996	Functional demarcation of a border between areas V6 and V6A in the superior parietal gyrus of the macaque monkey
121	GFGK99	Galletti, C et al.	1999	The cortical visual area V6: brain location and visual topography
122	GFKG99	Galletti, C et al.	1999	Brain location and visual topography of cortical area V6A in the macaque monkey
123	GG81	Gattass, R et al.	1981	Visual topography of striate projection zone (MT) in posterior superior temporal sulcus of the macaque.
124	GG88	Giguere, M et al.	1988	Mediodorsal Nucleus: Areal, Laminar, and Tangential Distribution of Afferents and Efferents in the Frontal Lobe of Rhesus Monkeys
125	GG95	Ghosh, S et al.	1995	A comparison of the ipsilateral cortical projections to the dorsal and ventral subdivisions of the macaque premotor cortex.
126	GGC99	Gray, D et al.	1999	Neurochemical Organization of Inferior Pulvinar Complex in Squirrel Monkeys and Macaques Reealed by Acetylcholinesterase Histochemistry, Calbindin and Cat-301 Immunostaining, and Wisteria floribunda Agglutinin Binding
127	GGKFLM01	Galletti, C et al.	2001	The cortical connections of area V6: an occipital-parietal network processing visual information
128	GGS81	Gattass, R et al.	1981	Visual topography of V2 in the macaque.
129	GHB07	Ghashghaei, H et al.	2007	"Sequence of information processing for emotions based on the anatomic dialogue between prefrontal cortex and amygdala"
130	GLKR84	Godschalk, M et al.	1984	Cortical afferents and efferents of monkey postarcurate area: an anatomical and electrophysiological study
131	GM	Kötter, R et al.	2001	General Map
132	GMH99	Gabernet, L et al.	1999	Parcellation of the lateral premotor cortex of the macaque monkey based on staining with the neurofilament antibody SMI-32
133	GP83	Galaburda, AM et al.	1983	The intrinsic architectonic and connectional organization of the superior temporal region of the rhesus monkey
134	GP85	Goldman-Rakic, PS et al.	1985	The Primate Mediodorsal (MD) Nucleus and Its Projection to the Frontal Lobe
135	GPFZBLal09	Gamberini, M et al.	2009	Cortical connections of the visuomotor parietooccipital area V6Ad of the macaque monkey
136	GSC85	Gattass, R et al.	1985	Cortical visual areas of the macaque: possible substrates for pattern recognition mechanisms
137	GSG88	Gattass, R et al.	1988	Visual organization and extent of V3 and V4 of the macaque.
138	GSMU97	Gattass, R et al.	1997	Cortical Projections of Area V2 in the Macaque
139	GSS84	Goldman-Rakic, PS et al.	1984	Dual pathways connecting the dorsolateral prefrontal cortex with the hippocampal formation in the rhesus monkey
140	GTVB90	Graff-Radford, NR et al.	1990	Diencephalic Amnesia
141	GYC95	Gutierrez, C et al.	1995	Neurochemical Subdivisions of the Inferior Pulvinar in Macaque Monkeys
142	HD91	Hedreen, JC et al.	1991	Organization of striatopallidal, striatonigral, and nigrostriatal projections in the macaque
143	HDS95	He, SQ et al.	1995	Topographic organization of corticospinal projections from the frontal lobe: motor areas on the medial surface of the hemisphere
144	HDUKSS07	Hackett, TA et al.	2007	Multisensory convergence in auditory cortex, II. Thalamocortical connections of the caudal superior temporal plane
145	HFM00	Haber, SN et al.	2000	Striatonigrostriatal pathways in primates form an ascending spiral from the shell to the dorsolateral striatum.
146	HHFSR80	Harting, JK et al.	1980	Ascending pathways from the monkey superior colliculus: an autoradiographic analysis
147	HJ89	Hirai, T et al.	1989	A new parcellation of the human thalamus on tha basis of histochemical staining
148	HK90	Huerta, MF et al.	1990	Supplementary eye field as defined by intracortical microstimulation: Connections in macaques
149	HM95	Hof, PR et al.	1995	Neurofilament protein defines regional patterns of cortical organization in the macaque monkey visual system: A quantitative immunohistochemical analysis
150	HMRJ95	Hashikawa, T et al.	1995	Patchy and laminar terminations of medial geniculate axons in monkey auditory cortex
151	HMS88	Hutchins, KD et al.	1988	Corticospinal projections from the medial wall of the hemisphere
152	HPS91	Holsapple, JW et al.	1991	The origin of thalamic inputs to the "hand" representation in the primary motor cortex
153	HSK98a	Hackett, TA et al.	1998	Subdivisions of auditory cortex and ipsilateral cortical connections of the parabelt auditory cortex in macaque monkeys
154	HSK98b	Hackett, TA et al.	1998	Thalamocortical connections of the parabelt auditory cortex in macaque monkeys
155	HSK99a	Hackett, TA et al.	1999	Callosal connections of the parabelt auditory cortex in macaque monkeys.
156	HSK99b	Hackett, TA et al.	1999	Prefrontal connections of the parabelt auditory cortex in macaque monkeys.
157	HTNT00	Hatanaka, N et al.	2000	Direct projections from the magnocellular division of the basal nucleus of the amygdala to the principal part of the cortical masticatory area in the macaque monkey
158	HV76	Herzog, AG et al.	1976	Temporal neocortical afferent connections to the amygdala in the rhesus monkey
159	HW72	Hubel, DH et al.	1972	Laminar and columnar distribution of geniculo-cortical fibers in the macaque monkey
160	HY81	Hedreen, JC et al.	1981	Homotopic and heterotopic callosal afferents of caudal inferior parietal lobule in Macaca mulatta
161	HYL81	Van Hoesen, GW et al.	1981	Widespread Corticostriate projections From Temporal Cortex of the Rhesus Monkey
162	IAC87a	Insausti, R et al.	1987	The entorhinal cortex of the monkey: II. Cortical afferents.
163	IAC87b	Insausti, R et al.	1987	The entorhinal cortex of the monkey: III. Subcortical afferents.
164	IAK99	Ilinsky, IA et al.	1999	Organization of projections from the anterior pole of the nucleus reticularis thalami (NRT) to subdivisions of the motor thalamus: light and electron microscopic studies in the rhesus monkey.
165	IK87	Ilinsky, IA et al.	1987	Sagittal cytoarchitectonic maps of the Macaca mulatta thalamus with a revised nomenclature of the motor-related nuclei validated by observations on their connectivity.
166	IM01	Insausti, R et al.	2001	Cortical projections of the non-entorhinal hippocampal formation in the cynomolgus monkey (Macaca fascicularis)
167	IM69	Iwai, E et al.	1969	Further evidence on the locus of the visual area in the temporal lobe of the monkey.
168	IST96	Inase, M et al.	1996	Overlapping corticostriatal projections from the supplementary motor area and the primary motor cortex in the macaque monkey: an anterograde double labeling study.
169	ITNAT96	Inase, M et al.	1996	Origin of thalamocortical projections to the presupplementary motor area (pre-SMA) in the macaque monkey
170	IVB86	Itaya, SK et al.	1986	Anterograde transsynaptic transport of WGA-HRP in the limbic system of rat and monkey
171	IY87	Iwai, E et al.	1987	Amygdalofugal and amygdalopetal connections with modality-specific visual cortical areas in macaques (Macaca fuscata, M. mulatta, M. fascicularis)
172	IY88	Iwai, E et al.	1988	A direct projection from hippocampal field CA1 to ventral area TE of inferotemporal cortex in the monkey.
173	IYSS87	Iwai, E et al.	1987	Amygdalar connections with middle and inferior temporal gyri of the monkey
174	J49	Jimenez-Castellanos, J	1949	The amygdaloid complex in monkey studied by reconstructional methods
175	J85	Jones, EG	1985	The Thalamus
176	JB76a	Jones, EG et al.	1976	Areal differences in the laminar distribution of thalamic afferents in cortical fields of the insular, parietal and temporal regions of primates
177	JB76b	Jones, EG et al.	1976	A projection from the medial pulvinar to the amygdala in primates
178	JCH78	Jones, EG et al.	1978	Intracortical connectivity of architectonic fields in the somatic sensory, motor and parietal cortex of monkeys
179	JDMRH95	Jones, EG et al.	1995	Subdivisions of macaque monkey auditory cortex revealed by calcium-binding protein immunoreactivity
180	JT75	Jacobson, S et al.	1975	Amygdaloid projections to prefrontal granular cortex in rhesus monkey demonstrated with horseradish peroxidase
181	JT77	Jacobson, S et al.	1977	Prefrontal granular cortex of the rhesus monkey. II. Interhemispheric cortical afferents
182	JWC79	Jones, EG et al.	1997	Different thalamic relationships of sensory-motor and parietal cortical fields in monkeys
183	K78	Künzle, H	1978	Cortico-cortical efferents of primary motor and somatosensory regions of the cerebral cortex in Macaca fascicularis
184	K94	Kurata, K	1994	Site of origin of projections from the thalamus to dorsal versus ventral aspects of the premotor cortex of monkeys
185	KA00	Kobayashi, Y et al.	2000	Macaque monkey retrosplenial cortex: I. Three-dimensional and cytoarchitectonic organization
186	KA77	Künzle, H et al.	1977	Efferent connections of cortical, area 8 (frontal eye field) in Macaca fascicularis. A reinvestigation using the autoradiographic technique.
187	KCTEC95	Krubitzer, LA et al.	1995	A redefinition of somatosensory areas in the lateral sulcus of macaque monkeys.
188	KH00	Kaas, JH et al.	2000	Subdivisions of auditory cortex and processing streams in primates
189	KH88	Kaas, JH et al.	1988	The Subcortical Visual System Of Primates
190	KHHJ97	Kosaki, H et al.	1997	Tonotopic organization of auditory cortical fields delineated by parvalbumin immunoreactivity in macaque monkeys.
191	KK75	Kievit, J et al.	1975	Subcortical Afferents to the Frontal Lobe in the Rhesus Monkey
192	KK77	Kievit, J et al.	1977	Organization of the thalamo-cortical connexions to the frontal lobe in the Rhesus monkey
193	KK93	Krubitzer, LA et al.	1993	The Dorsomedial Visual Area of Owl Monkey: Connections, Myeloarchitecture, and Homologies in Other Primates
194	KLA08	Kondo, H et al.	2008	Intrinsic connections of the macaque monkey hippocampal formation: I. Dentate gyrus
195	KSI03	Kultas-Ilinsky, K et al.	2003	Reevaluation of the primary motor cortex connections with the thalamus in primates.
196	KSP03	Kondo, H et al.	2003	"Differential connections of the temporal pole with the orbital and medial prefrontal networks in macaque monkeys"
197	KSP05	Kondo, H et al.	2005	Differential connections of the perirhinal and parahippocampal cortex with the orbital and medial prefrontal networks in macaque monkeys
198	KVR82	Kosel, KC et al.	1982	Non-hippocampal cortical projections from the entorhinal cortex in the rat and rhesus monkey
199	KW88	Komatsu, H et al.	1988	Relation of cortical areas MT and MST to pursuit eye movements. I. Localization and visual properties of neurons.
200	L33	Lorente de Nó, R	1933	Studies on the structure of the cerebral cortex. I: The area entorhinalis
201	L34	Lorente de Nó, R	1934	Studies on the structure of the cerebral cortex. II. Continuation of the study of the ammonic system
202	L45	Lauer, EW	1945	The nuclear pattern and fiber connections cf certain basal telencephalic centers in the macaque
203	L86	Leichnetz, GR	1986	Afferent and efferent connections of the dorsolateral precentral gyrus (area 4, hand/arm region) in the macaque monkey, with comparisons to area 8.
204	LCRM01	Luppino, G et al.	2001	Projections from the superior temporal sulcus to the agranular frontal cortex in the macaque.
205	LHGMG05	Luppino, G et al.	2005	Occipital (V6) and parietal (V6A) areas in the anterior wall of the parieto-occipital sulcus of the macaque: a cytoarchitectonic study
206	LHS80	Leinonen, L et al.	1980	Functional properties of neurons in the temporo-parietal association cortex of awake monkey.
207	LMCR93	Luppino, G et al.	1993	Corticocortical connections of area F3 (SMA-proper) and area F6 (Pre-SMA) in the macaque monkey
208	LMGM99	Luppino, G et al.	1999	Largely segregated parietofrontal connections linking rostral intraparietal cortex (areas AIP and VIP) and the ventral premotor cortex (areas F5 and F4)
209	LMWR02	Liu, J et al.	2002	Origins of callosal projections to the supplementary motor area (SMA): a direct comparison between pre-SMA and SMA-proper in macaque monkeys.
210	LPS94	Lu, MT et al.	1994	Interconnections between the prefrontal cortex and the premotor areas in the frontal lobe
211	LRCM03	Luppino, G et al.	2003	Prefrontal and agranular cingulate projections to the dorsal premotor areas F2 and F7 in the macaque monkey.
212	LSA02	Lavenex, P et al.	2002	"Perirhinal and parahippocampal cortices of the macaque monkey: Projections to the neocortex"
213	LSB86	Lysakowski, A et al.	1986	Histochemical and architectonic differentiation of zones of pretectal and collicular inputs to the pulvinar and dorsal lateral geniculate nuclei in the macaque
214	LV00a	Lewis, JW et al.	2000	Mapping of Architectonic Subdivisions in the Macaque Monkey, With Emphasis on Parieto-Occipital Cortex
215	LV00b	Lewis, JW et al.	2000	Corticocortical connections of visual, sensorimotor, and multimodal processing areas in the parietal lobe of the macaque monkey
216	LYL95	Levitt, JB et al.	1995	Connections between the pulvinar complex and cytochrome oxidase-defined compartments in visual area V2 of macaque monkey
217	M80	Mehler, WR	1980	Subcortical afferent connections of the amygdala in the monkey
218	MAT92	Matsuzaka, Y et al.	1992	A motor area rostral to the supplementary motor area (presupplementary motor area) in the monkey: Neuronal activity during a learned motor task.
219	MB73	Merzenich, MM et al.	1973	Representation of the cochlear partition on the superior temporal plane of the macaque monkey
220	MB84	Maguire, WM et al.	1984	Visuotopic organization of the prelunate gyrus in rhesus monkey
221	MB90	Morel, A et al.	1990	Anatomical segregation of two cortical visual pathways in the macaque monkey
222	MBG91	McGuire, P et al.	1991	Interhemispheric integration: I. Symmetry and convergence of the corticocortical connections of the left and the right principal sulcus (PS) and the left and the right supplementary motor area (SMA) in the rhesus monkey
223	MBMM93	Meunier, M et al.	1993	Effects on visual recognition of combined and seperate ablations of the entorhinal cortex in Rhesus monkeys
224	MCF86	Manzoni, T et al.	1986	Callosal Projections From Area SII to SI in Monkeys: Anatomical Organization and Comparison With Association Projections
225	MCGR86	Matelli, M et al.	1986	Afferent and efferent projections of the inferior area 6 in the macaque monkey
226	MCSGP04	Morecraft, RJ et al.	2004	Cytoarchitecture and cortical connections of the posterior cingulate and adjacent somatosensory fields in the rhesus monkey.
227	MDRLHJ95	Molinari, M et al.	1995	Auditory thalamocortical pathways defined in monkeys by calcium-binding protein immunoreactivity
228	MGBFSMal01	Marconi, B et al.	2001	Eye-hand Coordination during Reaching. I. Anatomical Relationships between Parietal and Frontal Cortex
229	MGGKL98	Matelli, M et al.	1998	Superior area 6 afferents from the superior parietal lobule in the macaque monkey.
230	MGGMC03	Marconi, B et al.	2003	Callosal connections of dorso-lateral premotor cortex
231	MGK93	Morel, A	1993	Tonotopic organization, architectonic fields, and connections of auditory cortex in monkeys
232	MGM92	Morecraft, RJ et al.	1992	Cytoarchitecture and neural afferents of orbitofrontal cortex in the brain of the monkey
233	MH00	McFarland, NR et al.	2000	Convergent inputs from thalamic motor nuclei and frontal cortical areas to the dorsal striatum in the primate.
234	MH02	McFarland, NR et al.	2002	Thalamic relay nuclei of the basal ganglia form both reciprocal and nonreciprocal cortical connections, linking multiple frontal cortical areas.
235	MH92	Martin-Elkins, CL et al.	1992	Cortical Afferents to Behaviorally Defined Regions of the Inferior Temporal and Parahippocampal Gyri as Demonstrated by WGA-HRP
236	MI05	Muñoz, M et al.	2005	Cortical efferents of the entorhinal cortex and the adjacent parahippocampal region in the monkey (Macaca fascicularis)
237	MJ97	Macchi, G et al.	1997	Toward an agreement on terminology of nuclear and subnuclear divisions of the motor thalamus.
238	ML96	Matelli, M et al.	1996	Thalamic input to mesial and superior area 6 in the Macaque monkey
239	MLFB07	Medalla, M et al.	2007	"Specificity in inhibitory systems associated with prefrontal pathways to temporal cortex in primates."
240	MLFR89	Matelli, M et al.	1989	Thalamic input to inferior area 6 and area 4 in the Macaque monkey
241	MLR85	Matelli, M et al.	1985	Patterns of cytochrome oxidase activity in the frontal agranular cortex of macaque monkey
242	MLR91	Matelli, M et al.	1991	Architecture of superior and mesial area 6 and the adjacent cingulate cortex in the macaque monkey
243	MLWJR05	Morel, A et al.	2005	Divergence and convergence of thalamocortical projections to premotor and supplementary motor cortex: a multiple tracing study in the macaque monkey.
244	MM82a	Mesulam, MM et al.	1982	Insula of the old world monkey. I: Architectonics in the insulo-orbito-temporal component of the paralimbic brain
245	MM82b	Mufson, EJ et al.	1982	Insula of the old world monkey. II: Afferent cortical input and comments on the claustrum
246	MM82c	Mesulam, MM et al.	1982	Insula of the old world monkey. III: Efferent cortical output and comments on function
247	MM84	Mufson, EJ et al.	1984	Thalamic connections of the insula in the rhesus monkey and comments on the paralimbic connectivity of the medial pulvinar nucleus
248	MMLW83	Mesulam, MM et al.	1983	Cholinergic innervation of cortex by the basal forebrain: cytochemistry and cortical connections of the septal area, diagonal band nuclei, nucleus basalis (substantia innominata), and hypothalamus in the rhesus monkey.
249	MMM87	Moran, MA et al.	1987	Neural inputs into the temporopolar cortex of the rhesus monkey
250	MMP81	Mufson, EJ et al.	1981	Insular interconnections with the amygdala in the rhesus monkey
251	MPP96	Morris, R et al.	1996	Area 30 (LE) in the macaque monkey: cytoarchitecture and connectivity
252	MPP99a	Morris, R et al.	1999	Fiber system linking the mid-dorsolateral frontal cortex with the retrosplenial/presubicular region in the Rhesus monkey
253	MRV00	Morecraft, RJ et al.	2000	Localization of area prostriata and its projection to the cingulate motor cortex in the rhesus monkey
254	MV83	Maunsell, JHR et al.	1983	The connections of the middle temporal visual area (MT) and their relationship to a cortical hierarchy in the macaque monkey.
255	MV87	Maunsell, JHR et al.	1987	Topographic organization of the middle temporal visual area in the macaque monkey: representational biases and the relationship to callosal connections and myeloarchitectonic boundaries.
256	MV92	Morecraft, RJ et al.	1992	Cingulate input to the primary and supplementary motor cortices in the rhesus monkey: evidence for somatotopy in areas 24c and 23c
257	MV93	Morecraft, RJ et al.	1993	Frontal granular cortex input to the cingulate (M3), supplementary (M2) and primary (M1) motor cortices in the rhesus monkey
258	MW87	Mitz, AR et al.	1987	The somatotopic organization of the supplementary motor area: Intracortical microstimulation mapping
259	NHYM96	Nimchinsky, EA et al.	1996	Neurochemical, morphologic, and laminar characterization of cortical projection neurons in the cingulate motor areas of the macaque monkey
260	NK78	Norden, JJ et al.	1978	The identification of relay neurons in the dorsal lateral geniculate nucleus of monkeys using horseradish peroxidase
261	NKWKKMal01	Nakamura, H et al.	2001	From three-dimensional space vision to prehensile hand movements: the lateral intraparietal area links the area V3A and the anterior intraparietal area in macaques.
262	NMV80	Newsome, WT et al.	1980	Areal boundaries and topographic organization of the ventral posterior area (VP) of the macaque monkey.
263	NMV86	Newsome, WT et al.	1986	Ventral posterior visual area of the macaque: visual topography and areal boundaries.
264	NPP87	Neal, JW et al.	1987	The cortico-cortical connections of area 7b, PF, in the parietal lobe of the monkey.
265	NPP88	Neal, JW et al.	1988	The cortico-cortical connections within the parieto-temporal lobe of area PG,7a, in the monkey
266	NPP90a	Powell, TPS et al.	1990	The ipsilateral cortical connections of area 7 with the frontal lobe in the monkey
267	NPP90b	Neal, JW et al.	1990	The connections of area PG, 7a, with cortex in the parietal, occipital and temporal lobes of the monkey
268	O52	Olszewski, J	1952	The Thalamus of the Macaca Mulatta
269	OAO02	OBrien, BJ et al.	2002	"Connections of calbindin-D28k-defined subdivisions in inferior pulvinar with visual areas V2, V4 and MT in macaque monkeys."
270	OMG96	Olson, CR et al.	1996	Single neurons in posterior cingulate cortex of behaving macaque: eye movement signals.
271	P81a	Price, JL	1981	Toward a consistent terminology for the amygdaloid complex
272	PA34	Papez, JW et al.	1934	Thalamic nuclei of the Pithecus (Macacus) Rhesus, part I. ventral thalamus
273	PA81	Price, JL et al.	1981	An autoradiographic study of the projections of the central nucleus of the monkey amygdala
274	PA91	Pitkänen, A et al.	1991	Demonstration of projections from the lateral nucleus to the basal nucleus of the amygdala: A PHA-L study in the monkey
275	PA98	Pitkänen, A et al.	1998	Organization of the intrinsic connections of the monkey amygdaloid complex: Projections originating in the lateral nucleus
276	PBK86	Perkel, DJ et al.	1986	Topography of the Afferent Connectivity of Area 17 in the Macaque Monkey: A Double-Labelling Study
277	PCG81	Porrino, LJ et al.	1981	Direct and indirect pathways from the amygdala to the frontal lobe in rhesus monkeys.
278	PG89	Preuss, TM et al.	1989	Connections of the ventral granular frontal cortex of macaques with perisylvian premotor and somatosensory areas: Anatomical evidence for somatic representation in primate frontal association cortex
279	PG91a	Preuss, TM et al.	1991	Myelo- and cytoarchitecture of the granular frontal cortex and surrounding regions in the strepsirhine primate Galago and the anthropoid primate Macaca
280	PG91b	Preuss, TM et al.	1991	Architectonics of the parietal and temporal association cortex in the strepsirhine primate Galago compared to the anthropoid primate Macaca
281	PGCK85	Pons, TP et al.	1985	The somatotopic organization of area 2 in macaque monkeys.
282	PHMN86	Pritchard, TC et al.	1986	Projections of thalamic gustatory and lingual areas in the monkey, Macaca fascicularis
283	PHT00	Paxinos, G et al.	2000	The Rhesus monkey brain in stereotactic coordinates
284	PK85	Pons, TP et al.	1985	Connections of Area 2 of Somatosensory Cortex With the Anterior Pulvinar and Subdivisions of the Ventroposterior Complex in Macaque Monkeys
285	PLD50	Pribram, KH et al.	1950	Some connections of the orbito-fronto-temporal, limbic and hippocampal areas of Macaca mulatta
286	PM59	Powell, TPS et al.	1959	The cytoarchitecture of the postcentral gyrus of the monkey Macaca mulatta.
287	PP02	Petrides, M et al.	2002	Comparative cytoarchitectonic analysis of the human and the macaque ventrolateral prefrontal cortex and corticocortical connection patterns in the monkey
288	PP04	Parent, M et al.	2004	The pallidofugal motor fiber system in primates.
289	PP06	Parent, M et al.	2006	"Single-axon tracing study of corticostriatal projections arising from primary motor cortex in primates."
290	PP06a	Petrides, M et al.	2006	"Efferent association pathways originating in the caudal prefrontal cortex in the macaque monkey."
291	PP84	Petrides, M et al.	1984	Projections to frontal cortex from the posterior parietal region in the rhesus monkey
292	PP88	Petrides, M et al.	1988	Association fiber pathways to the frontal cortex from the superior temporal region in the rhesus monkey
293	PP94	Petrides, M et al.	1994	Comparative architectonic analysis of the human and the macaque frontal cortex
294	PP99	Petrides, M et al.	1999	Dorsolateral prefrontal cortex: comparative cytoarchitectonic analysis in the human and the macaque brain and corticocortical connection patterns
295	PRA87	Price, JL et al.	1987	The limbic region region. II:The amygdaloid complex
296	PS73	Pandya, DN et al.	1973	Architectonic parcellation of the temporal operculum in rhesus monkey and its projection pattern
297	PS82	Pandya, DN et al.	1982	Intrinsic connections and architectonics of posterior parietal cortex in the rhesus monkey
298	PSB88	Pandya, DN et al.	1988	Input-Output organization of the primate cerebral cortex
299	PVBD06	Parvizi, J et al.	2006	"Neural connections of the posteromedial cortex in the macaque."
300	PVD73	Pandya, DN et al.	1973	A cingulo-amygdaloid projection in the rhesus monkey
301	PVM81	Pandya, DN et al.	1981	Efferent connections of the cingulate gyrus in the rhesus monkey
302	PW51	Penfield, W et al.	1951	The supplementary motor area of the cerebral cortex
303	RA63	Roberts, TS et al.	1963	Insular and opercular cortex and its thalamic projection in Macaca mulatta
304	RACR99	Rockland, KS et al.	1999	Single axon analysis of pulvinocortical connections to several visual areas in the macaque
305	RAP85b	Russchen, FT et al.	1985	The afferent connections of the substantia innominata in the monkey, Macaca fascicularis
306	RAP87	Russchen, FT et al.	1987	The Afferent Input to the Magnocellular Division of the Mediodorsal Thalamic Nucleus in the Monkey, Macaca fascicularis
307	RB77	Rezak, M et al.	1977	A redefinition of pulvinar subdivisions in the macaque monkey: Evidence for three distinct subregions withon classically defined lateral pulvinar
308	RB79	Rezak, M et al.	1979	A comparison of the organization of the projections of the dorsal lateral geniculate nucleus, the inferior pulvinar and adjacent lateral pulvinar to primary visual cortex (area 17) in the macaque monkey
309	RB80a	Robinson, CJ et al.	1980	Somatotopographic organization in the second somatosensory area of M. fascicularis
310	RB80b	Robinson, CJ et al.	1980	Organization of somatosensory receptive fields in cortical areas 7b, retroinsula, postauditory and granular insula of M. fascicularis
311	RB98	Rempel-Clower, NL et al.	1998	"Topographic Organization of Connections Between the Hypothalamus and Prefrontal Cortex in the Rhesus Monkey"
312	RBG99	Romanski, LM et al.	1999	Auditory belt and parabelt projections to the prefrontal cortex in the rhesus monkey
313	RBMWJ98	Rausell, E et al.	1998	Extensive divergence and convergence in the thalamocortical projection to monkey somatosensory cortex.
314	RCBBGMal06	Rozzi, S et al.	2006	Cortical connections of the inferior parietal cortical convexity of the macaque monkey.
315	RD96	Rockland, KS et al.	1996	Collateralized Divergent Feedback Connections That Target Multiple Cortical Areas
316	RGBG97	Romanski, LM et al.	1997	Topographic organization of medial pulvinar connections with the prefrontal cortex in the rhesus monkey
317	RLBMW94	Rouiller, EM et al.	1994	Cerebellothalamocortical and pallidothalamocortical projections to the primary and supplementary motor cortical areas: a multiple tracing study in macaque monkeys
318	RLM96	Rizzolatti, G et al.	1996	The classic supplementary motor area is formed by two independent areas.
319	RM	Kötter, R et al.	2005	Regional map of Macaque cortex
320	RP79	Rockland, KS et al.	1979	Laminar origins and terminations of cortical connections of the occipital lobe in the rhesus monkey
321	RP83	Rosene, DL et al.	1983	Architectonics and connections of the posterior parahippocampal gyrus in the rhesus monkey.
322	RP93	Ray, JP et al.	1993	The organization of the projections from the mediodorsal nucleus of the thalamus to orbital and medial prefrontal cortex in the monkey.
323	RTFMGR99	Romanski, LM et al.	1999	Dual streams of auditory afferents target multiple domains in the primate prefrontal cortex
324	RTMB99	Rouiller, EM et al.	1999	Origin of thalamic inputs to the primary, premotor, and supplementary motor cortical areas and to area 46 in macaque monkeys: a multiple retrograde tracing study
325	RTMKBW98	Rouiller, EM et al.	1998	Dual morphology and topography of the corticothalamic terminals originating from the primary, supplementary motor, and dorsal premotor cortical areas in macaque monkeys.
326	RV77	Rosene, DL et al.	1977	Hippocampal efferents reach widespread areas of cerebral cortex and amygdala in the Rhesus monkey
327	RV87	Rosene, DL et al.	1987	The hippocampal formation of the primate brain. A review of some comparative aspects of cytoarchitecture and connections
328	RV94	Rockland, KS et al.	1994	Direct temporal-occipital feedback connections to striate cortex (V1) in the macaque monkey
329	RV99	Rockland, KS et al.	1999	Some temporal and parietal cortical connections converge in CA1 of the primate hippocampus
330	S01	Shipp, S	2001	Corticopulvinar connections of areas V5, V4, and V3 in the macaque monkey: a dual model of retinal and cortical topographies
331	S70	Sanides, F	1970	Functional architecture of motor and sensory cortices in primates in the light of a new concept of neocortex evolution
332	S72	Sanides, F	1972	Representation in the cerebral cortex and its areal lamination pattern
333	S73	Sanides, F	1973	Representation in the cerebral cortex of its areal lamination patterns
334	SA00	Stefanacci, L et al.	2000	Topographic organization of cortical inputs to the lateral nucleus of the macaque monkey amygdala: A retrograde tracing study
335	SA07	Saunders, RC et al.	2007	"Origin and Topography of Fibers Contributing to the Fornix in Macaque Monkeys"
336	SA70	Stephan, H et al.	1970	The allocortex in primates
337	SA90	Suzuki, WA et al.	1990	Cortical inputs to the CA1 field of the monkey hippocampus originate from the perirhinal and parahippocampal cortex but not from area TE
338	SA94a	Suzuki, WA et al.	1994	Perirhinal and parahippocampal cortices of the macaque monkey: Cortical afferents
339	SA94b	Suzuki, WA et al.	1994	Topographic organization of the reciprocal connections between the monkey entorhinal cortex and the perirhinal and parahippocampal cortices.
340	SAG50a	Sugar, O et al.	1950	Corticocortical connections of posterior wall of central sulcus in monkey
341	SAG50b	Sugar, O et al.	1950	Cortico-cortical connections of the walls of the superior temporal sulcus in the monkey (Macaca mulatta)
342	SB83	Standage, GP et al.	1983	The organization of connections between the pulvinar and visual area MT in the macaque monkey
343	SBZ98	Shipp, S et al.	1998	A visuo-somatomotor pathway through superior parietal cortex in the macaque monkey: cortical connections of areas V6 and V6A
344	SCGMWC96	Seltzer, B et al.	1996	Overlapping and nonoverlapping cortical projections to cortex of the superior temporal sulcus in the rhesus monkey: double anterograde tracer studies
345	SDGM89	Stanton, GB et al.	1989	Cytoarchitectural characteristic of the frontal eye fields in macaque monkeys
346	SG84	Schwartz, ML et al.	1984	Callosal and intrahemispheirc connectivity of the prefrontal association cortex in rhesus monkey: relation between intraparietal and principal sulcal cortex
347	SG85	Selemon, LD et al.	1985	Longitudinal topography and interdigitation of corticostriatal projections in the rhesus monkey.
348	SG88	Selemon, LD et al.	1988	Common cortical and subcortical targets of the dorsolateral prefrontal and posterior parietal cortices in the rhesus monkey: evidence for a distributed neural network subserving spatially guided behavior
349	SH03	Sincich, LC et al.	2003	Independent projection streams from macaque striate cortex to the second visual area and middle temporal area
350	SHUKLJal07	Smiley, JF et al.	2007	"Multisensory convergence in auditory cortex, I. Cortical connections of the caudal superior temporal plane in macaque monkeys"
351	SJ02	Simonyan, K et al.	2002	Cortico-cortical projections of the motorcortical larynx area in the rhesus monkey.
352	SK96	Stepniewska, I et al.	1996	Topographic pattern of V2 cortical connections in macaque monkeys
353	SK97	Stepniewska, I et al.	1997	Architectonic subdivisions of the inferior pulvinar in New World and Old World monkeys
354	SKP08	Saleem, KS et al.	2008	Complementary circuits connecting the orbital and medial prefrontal networks with the temporal, insular, and opercular cortex in the macaque monkey.
355	SMB68	Shanta, T et al.	1968	A Stereotaxic Atlas of the Java Monkey Brain
356	SMKB95	Schall, JD et al.	1995	Topography of Visual Cortex Connections with Frontal Eye Field in Macaque: Convergence and Segregation of Processing Streams
357	SMM82	Schein, SJ et al.	1982	Is there a high concentration of color-selective cells in area V4 of monkey visual cortex?
358	SP09	Seltzer, B et al.	2009	Posterior cingulate and retrosplenial cortex connections of the caudal superior temporal region in the rhesus monkey
359	SP78	Seltzer, B et al.	1978	Afferent cortical connections and architectonics of the superior temporal sulcus and surrounding cortex in the rhesus monkey
360	SP80	Seltzer, B et al.	1980	Converging visual and somatic sensory cortical input to the intraparietal sulcus of the rhesus monkey
361	SP84	Seltzer, B et al.	1984	Further observations on parieto-temporal connections in the rhesus monkey
362	SP86	Seltzer, B et al.	1986	Posterior parietal projections to the intraparietal sulcus of the rhesus monkey
363	SP89a	Seltzer, B et al.	1989	Frontal lobe connections of the superior temporal sulcus in the rhesus monkey.
364	SP89b	Seltzer, B et al.	1989	Intrinsic connections and architectonics of the superior temporal sulcus in the rhesus monkey.
365	SP90	Schmahmann, JD et al.	1990	Anatomical investigation of projections from thalamus to posterior parietal cortex in the Rhesus monkey: A WGA-HRP and fluorescent tracer study
366	SP91a	Siwek, DF et al.	1991	Prefrontal Projections to the Mediodorsal Nucleus of the Thalamus in the Rhesus monkey
367	SP91b	Seltzer, B et al.	1991	Post-rolandic cortical projections of the superior temporal sulcus in the rhesus monkey
368	SP94	Seltzer, B et al.	1994	Parietal, temporal, and occipital projections to cortex of the superior temporal sulcus in the rhesus monkey: a retrograde tracer study
369	SPAG50	Sugar, O et al.	1950	Corticocortical connections of the cortex buried in the intraparietal and principal sulci of the monkey (Macaca mulatta)
370	SPH07	Saleem, KS et al.	2007	Cytoarchitectonic and chemoarchitectonic subdivisions of the perirhinal and parahippocampal cortices in macaque monkeys.
371	SQK00	Stepniewska, I et al.	2000	Projections of the superior colliculus to subdivisions of the inferior pulvinar in New World and Projections of the superior colliculus to subdivisions of the inferior pulvinar in New World and Old World monkeys
372	SR88	Saunders, RC et al.	1988	A comparison of the efferents of the amygdala and the hippocampal formation in the rhesus monkey: I. Convergence in the entorhinal, prorhinal, and perirhinal cortices.
373	SRV88	Saunders, RC et al.	1988	Comparison of the efferents of the amygdala and the hippocampal formation in the rhesus monkey: II. Reciprocal and non-reciprocal connections
374	SS87	Schlag, J et al.	1987	Evidence for a supplementary eye field
375	SSA96	Stefanacci, L et al.	1996	Organization of connections between the amygdaloid complex and the perirhinal and parahippocampal cortices in macaque monkeys
376	SSS91	Shook, BL et al.	1991	Primate supplementary eye field. II. Comparative aspects of connections with the thalamus, corpus striatum, and related forebrain nuclei.
377	SSTH00	Saleem, KS et al.	2000	Connections between anterior inferotemporal cortex and superior temporal sulcus in the macaque monkey.
378	ST96	Saleem, KS et al.	1996	Divergent projections from the anterior inferotemporal area TE to the perirhinal and entorhinal cortices in the macaque monkey
379	STR93	Saleem, KS et al.	1993	Specific and columnar projection from area TEO to TE in the macaque inferotemporal cortex
380	SUD90	Saint-Cyr, JA et al.	1990	Organization of visual cortical inputs to the striatum and subsequent outputs to the pallido-nigral complex in the monkey
381	SYTHFI86	Saito, H et al.	1986	Integration of direction signals of image motion in the superior temporal sulcus of the macaque monkey
382	SZ85	Shipp, S et al.	1985	Segregation of pathways leading from V2 to areas V4 and V5 of macaque monkey visual cortex
383	SZ95	Shipp, S et al.	1995	Segregation and convergence of specialised pathways in macaqe monkey visual cortex
384	TBVD88	Tranel, D et al.	1988	Parahippocampal projections to posterior auditory association cortex (area Tpt) in old-world monkeys
385	THSYFI86	Tanaka, K et al.	1986	Analysis of local and wide-field movements in the superior temporal visual areas of the macaque monkey
386	TJ74	Trojanowski, JQ et al.	1974	Medial pulvinar afferents to frontal eye field in rhesus monkey demonstrated by horseradish peroxidase
387	TJ76	Trojanowski, JQ et al.	1976	Areal and laminar distribution of some pulvinar cortical efferents in rhesus monkey
388	TMK80	Turner, BH et al.	1980	Organization of the amygdalopetal projections from modality-specific cortical association areas in the monkey
389	TNHTMTal04	Takada, M et al.	2004	Organization of prefrontal outflow toward frontal motor-related areas in macaque monkeys.
390	TRB02	Tanne-Gariepy, J et al.	2002	Parietal inputs to dorsal versus ventral premotor areas in the macaque monkey: evidence for largely segregated visuomotor pathways.
391	TT93	Tokuno, H et al.	1993	Input organization of distal and proximal forelimb areas in the monkey primary motor cortex: a retrograde double labeling study
392	TTHIIIal01	Takada, M et al.	2001	Organization of inputs from cingulate motor areas to basal ganglia in macaque monkey.
393	TTNI97	Tokuno, H et al.	1997	Reevaluation of ipsilateral corticocortical inputs to the orofacial region of the primary motor cortex in the macaque monkey
394	TWC86	Tanaka, M et al.	1986	Visual properties and spatial distribution of neurons in the visual association area on the prelunate gyrus of the awake monkey
395	U85	Ungerleider, LG	1985	The corticocortical pathways for object recognition and spatial perception
396	UD86a	Ungerleider, LG et al.	1986	Projections to the superior temporal sulcus from the central and peripheral field representations of V1 and V2.
397	UD86b	Ungerleider, LG et al.	1986	Cortical connections of visual area MT in the macaque.
398	UDGM84	Ungerleider, LG et al.	1984	Subcortical projections of area MT in the macaque
399	UGM83	Ungerleider, LG et al.	1983	Visuotopic organization of projections from striate cortex to inferior and lateral pulvinar in rhesus monkey
400	UM79	Ungerleider, LG et al.	1979	The striate projection zone in the superior temporal sulcus of Macaca mulatta: Location and topographic organization.
401	V76	Vogt, BA	1976	Retrosplenial cortex in the rhesus monkey: A cytoarchitectonic and Golgi study
402	V82	Van Hoesen, GW	1982	The parahippocampal gyrus: New observations regarding its cortical connections in monkeys
403	V85a	Vogt, BA	1985	Cingulate cortex
404	V85b	Van Essen, DC	1985	Functional organization of primate visual cortex.
405	V93	Vogt, BA	1993	The structural organization of cingulate cortex: Areas, neurons and somatodendritic receptors.
406	VFDOK90	Van Essen, DC et al.	1990	Modular and hierarchical organization of extrastriate visual cortex in the macaque monkey.
407	VMB81	Van Essen, DC et al.	1981	The middle temporal visual area in the macaque: myeloarchitecture, connections, functional properties, and topographic organization.
408	VMV93	Van Hoesen, GW et al.	1993	Connections of the Monkey Cingulate Cortex
409	VNB82	Van Essen, DC et al.	1982	The pattern of interhemispheric connections and its relationship to extrastriate visual areas in the macaque monkey.
410	VNM84	Van Essen, DC et al.	1984	The visual field representation in striate cortex of the macaque monkey: asymmetries, anisotropies, and individual variability.
411	VNMB86	Van Essen, DC et al.	1986	The projections from striate cortex (V1) to areas V2 and V3 in the macaque monkey: asymmetries, areal boundaries, and patchy connections.
412	VP75	Van Hoesen, GW et al.	1975	Some connections of the entorhinal (area 28) and perirhinal (area 35) cortices of the rhesus monkey. I. Temporal lobe afferents
413	VP75c	Van Hoesen, GW et al.	1975	Some connections of the entorhinal (area 28) and perirhinal (area 35) cortices of the rhesus monkey. III. Efferent connections
414	VP87	Vogt, BA et al.	1987	Cingulate cortex of the Rhesus monkey: II. Cortical afferents
415	VPR87	Vogt, BA et al.	1987	Cingulate cortex of the rhesus monkey: I. Cytoarchitecture and thalamic afferents
416	VRP78	Vogt, BA et al.	1978	Thalamic and cortical afferents differentiate anterior from posterior cingulate cortex in the monkey
417	VSA07	Vann, SD et al.	2007	"Distinct, parallel pathways link the medial mammillary bodies to the anterior thalamus in macaque monkeys"
418	VV19	Vogt, C et al.	1919	Ergebnisse unserer Hirnforschung. Dritte Mitteilung: Die architektonische Rindenfelderung im Lichte unserer neuesten Forschungen
419	VVFB05	Vogt, BA et al.	2005	Architecture and neurocytology of monkey cingulate gyrus
420	VZ78	Van Essen, DC et al.	1978	The topographic organization of rhesus monkey prestriate cortex.
421	W38	Walker, AE	1938	The Primate Thalamus
422	W40	Walker, AE	1940	A cytoarchitectural study of the prefrontal areas of macaque monkey
423	W43	Woolsey, CN	1943	Second somatic receiving areas in the cerebral cortex of cat, dog and monkey
424	W44	Woolsey, CN	1944	Additional observations on a second somatic receiving area in the cerebral cortex of the monkey
425	W58	Woolsey, CN	1958	Organization of somatic and sensory and motor areas in the cerebral cortex
426	WA91	Witter, MP et al.	1991	Entorhinal cortex of the monkey: V. Projections to the dentate gyrus, hippocampus, and subicular complex
427	WBU93	Webster, MJ et al.	1993	Subcortical connections of inferior temporal areas TE and TEO in macaque monkeys
428	WBU94	Webster, MJ et al.	1994	Connections of inferior temporal areas TEO and TE with parietal and frontal cortex in macaque monkeys
429	WF46	Woolsey, CN et al.	1946	Contralateral, ipsilateral and bilateral representation of cutaneous receptors in somatic area I and II of the cerebral cortex of pig, sheep and other mammals
430	WPW69	Whitsel, BL et al.	1969	Symmetry and connectivity in the map of the body surface in somatosensory area II of primates
431	WR97	Wellman, BJ et al.	1997	Divergent cortical connections to entorhinal cortex from area TF in the macaque.
432	WSMSPT52	Woolsey, CN et al.	1952	Patterns of localization in precentral and supplementary motor areas and their relation to the concept of a premotor area
433	WUB91	Webster, MJ et al.	1991	Connections of inferior temporal areas TE and TEO with medial temporal-lobe structures in infant and adult monkeys
434	WVA89	Witter, MP et al.	1989	Topographical organization of the entorhinal projection to the dentate gyrus of the monkey
435	WW43	Walzl, EM et al.	1943	Cortical auditory areas of the monkey as determined by electrical excitation of nerve fibres in the osseous spiral laminar and by electrical stimulation.
436	XB04	Xiao, D et al.	2004	"Circuits through prefrontal cortex, basal ganglia, and ventral anterior nucleus map pathways beyond motor control"
437	Y00	Yukie, M	2000	Connections between the medial temporal cortex and the CA1 subfield of the hippocampal formation in the Japanese monkey (Macaca fuscata)
438	YI81	Yukie, M et al.	1981	Direct Projection From the Dorsal Lateral Geniculate Nucleus to the Prestriate Cortex in MAcaque Monkeys
439	YI85	Yukie, M et al.	1985	Laminar origin of direct projection from cortex area V1 to V4 in the rhesus monkey
440	YI88	Yukie, M et al.	1988	Direct projections from the ventral TE area of the inferotemporal cortex to the hippocampal field CA1 in the monkey
441	YP85	Yeterian, EH et al.	1985	Corticothalamic connections of the posterior parietal cortex in the rhesus monkey
442	YP88	Yeterian, EH et al.	1988	Corticothalamic connections of paralimbic regions in the rhesus monkey
443	YP89	Yeterian, EH et al.	1989	Thalamic Connections of the Cortex of the Superior Temporal Sulcus in the Rhesus Monkey
444	YP91	Yeterian, EH et al.	1991	Corticothalamic connections of the superior temporal sulcus in rhesus monkeys
445	YP91b	Yeterian, EH et al.	1991	Prefrontostriatal Connections in Realtion to Cortical Architectonic Organization in Rhesus Monkeys
446	YP93	Yeterian, EH et al.	1993	Striatal connections of the parietal association cortices in rhesus monkeys
447	YP94	Yeterian, EH et al.	1994	Laminar origin of striatal and thalamic projections of the prefrontal cortex in rhesus monkeys.
448	YP95	Yeterian, EH et al.	1995	Corticostriatal connections of extrastriate visual areas in rhesus monkeys.
449	YP97	Yeterian, EH et al.	1997	Corticothalamic connections of extrastriate visual areas in rhesus monkeys
450	YTHI90	Yukie, M et al.	1990	Differential connectivity of inferotemporal area TE with the amygdala and the hippocampus in the monkey
451	Z69	Zeki, S	1969	Representation of central visual fields in prestriate cortex.
452	Z71	Zeki, S	1971	Cortical projections from two prestriate areas in the monkey.
453	Z73	Zeki, S	1973	Color coding in rhesus monkey prestriate cortex.
454	Z77	Zeki, S	1977	Color coding in the superior temporal sulcus of rhesus monkey visual cortex.
455	Z78a	Zeki, S	1978	The cortical projections of foveal striate cortex in the rhesus monkey.
456	Z78b	Zeki, S	1978	The third visual complex of rhesus monkey prestriate cortex
457	Z78c	Zeki, S	1978	Uniformity and diversity of structure and function rhesus monkey prestriate cortex.
458	ZR03	Zhong, Y et al.	2003	Inferior parietal lobule projections to anterior inferotemporal cortex (area TE) in macaque monkey
459	ZSCR93	Zola-Morgan, S et al.	1993	Damage to the perirhinal cortex exacerbates memory impairment following lesions to the hippocampal formation
