# Supplementary material for: A high-throughput neurohistological pipeline for brain-wide mesoscale connectivity mapping of the common marmoset
Source: eLife. 2019 Feb 5;8:e40042. doi: 10.7554/eLife.40042 (PMC6384052; doi:10.7554/eLife.40042)
Supplement: Supplementary file 2. [file elife-40042-supp2.xlsx]

## Sheet: Sheet1
Brain/MINDS ID	Brain region	Abbreviation	Volume (mm^3)	# Injections	Hierarchy
5	Olfactory bulb	OB	5.31558	1	FOREBRAIN	TELENCEPHALON	OLFACTORY BULB
7	Anterior olfactory nucleus	AON	0.61364	0	FOREBRAIN	TELENCEPHALON	OLFACTORY BULB
21	Olfactry tubercle	Tu	3.89638	0	FOREBRAIN	TELENCEPHALON	OLFACTORY BULB
24	Tenia tecta	TT	0.02576	0	FOREBRAIN	TELENCEPHALON	OLFACTORY BULB
26	Agranular insular cortex	AI	2.16071	0	FOREBRAIN	TELENCEPHALON	CEREBRUM; CEREBRAL CORTEX
27	Anterior intraparietal area of cortex	AIP	4.62815	1	FOREBRAIN	TELENCEPHALON	CEREBRUM; CEREBRAL CORTEX
28	Areas 1 and 2 of cortex	A1/2	17.8865	2	FOREBRAIN	TELENCEPHALON	CEREBRUM; CEREBRAL CORTEX
29	Area 3a of cortex (primary somatosensory)	A3a	25.7685	3	FOREBRAIN	TELENCEPHALON	CEREBRUM; CEREBRAL CORTEX
30	Area 3b of cortex (primary somatosensory)	A3b	25.0779	3	FOREBRAIN	TELENCEPHALON	CEREBRUM; CEREBRAL CORTEX
31	Area 4 of cortex; parts a and b (primary motor)	A4ab	25.022	3	FOREBRAIN	TELENCEPHALON	CEREBRUM; CEREBRAL CORTEX
32	Area 4 of cortex; part c (primary motor)	A4c	1.17889	0	FOREBRAIN	TELENCEPHALON	CEREBRUM; CEREBRAL CORTEX
33	Area 6 of cortex; dorsocaudal part	A6DC	10.76	1	FOREBRAIN	TELENCEPHALON	CEREBRUM; CEREBRAL CORTEX
34	Area 6 of cortex; dorsorostral part	A6DR	14.3292	2	FOREBRAIN	TELENCEPHALON	CEREBRUM; CEREBRAL CORTEX
35	Area 6 of cortex; medial (supplementary motor) part	A6M	16.0093	2	FOREBRAIN	TELENCEPHALON	CEREBRUM; CEREBRAL CORTEX
36	Area 6 of cortex; ventral; part a	A6Va	12.2132	2	FOREBRAIN	TELENCEPHALON	CEREBRUM; CEREBRAL CORTEX
37	Area 6 of cortex; ventral; part b	A6Vb	4.51757	1	FOREBRAIN	TELENCEPHALON	CEREBRUM; CEREBRAL CORTEX
38	Area 8a of cortex; dorsal part	A8aD	12.8791	2	FOREBRAIN	TELENCEPHALON	CEREBRUM; CEREBRAL CORTEX
39	Area 8a of cortex; ventral part	A8aV	12.4259	2	FOREBRAIN	TELENCEPHALON	CEREBRUM; CEREBRAL CORTEX
40	Area 8b of cortex	A8b	16.1478	2	FOREBRAIN	TELENCEPHALON	CEREBRUM; CEREBRAL CORTEX
41	Area 8 of cortex; caudal part	A8C	3.52526	0	FOREBRAIN	TELENCEPHALON	CEREBRUM; CEREBRAL CORTEX
42	Area 9 of cortex	A9	9.50581	1	FOREBRAIN	TELENCEPHALON	CEREBRUM; CEREBRAL CORTEX
43	Area 10 of cortex	A10	15.1644	2	FOREBRAIN	TELENCEPHALON	CEREBRUM; CEREBRAL CORTEX
44	Area 11 of cortex	A11	4.58675	1	FOREBRAIN	TELENCEPHALON	CEREBRUM; CEREBRAL CORTEX
45	Area 13a of cortex	A13a	1.59197	0	FOREBRAIN	TELENCEPHALON	CEREBRUM; CEREBRAL CORTEX
46	Area 13b of cortex	A13b	1.91434	0	FOREBRAIN	TELENCEPHALON	CEREBRUM; CEREBRAL CORTEX
47	Area 13 of cortex; lateral part	A13L	10.9452	1	FOREBRAIN	TELENCEPHALON	CEREBRUM; CEREBRAL CORTEX
48	Area 13 of cortex; medial part	A13M	5.62911	1	FOREBRAIN	TELENCEPHALON	CEREBRUM; CEREBRAL CORTEX
49	Area 14 of cortex; caudal part	A14C	1.25874	0	FOREBRAIN	TELENCEPHALON	CEREBRUM; CEREBRAL CORTEX
50	Area 14 of cortex; rostral part	A14R	4.2677	1	FOREBRAIN	TELENCEPHALON	CEREBRUM; CEREBRAL CORTEX
51	Area 19 of cortex; dorsointermediate part	A19DI	9.28758	1	FOREBRAIN	TELENCEPHALON	CEREBRUM; CEREBRAL CORTEX
52	Area 19 of cortex; medial part	A19M	13.181	2	FOREBRAIN	TELENCEPHALON	CEREBRUM; CEREBRAL CORTEX
53	Area 23a of cortex	A23a	9.02759	1	FOREBRAIN	TELENCEPHALON	CEREBRUM; CEREBRAL CORTEX
54	Area 23b of cortex	A23b	16.3407	2	FOREBRAIN	TELENCEPHALON	CEREBRUM; CEREBRAL CORTEX
55	Area 23c of cortex	A23c	4.15306	0	FOREBRAIN	TELENCEPHALON	CEREBRUM; CEREBRAL CORTEX
56	Area 23 of cortex; ventral part	A23V	9.37222	1	FOREBRAIN	TELENCEPHALON	CEREBRUM; CEREBRAL CORTEX
57	Area 24a of cortex	A24a	6.90276	1	FOREBRAIN	TELENCEPHALON	CEREBRUM; CEREBRAL CORTEX
58	Area 24b of cortex	A24b	12.8863	2	FOREBRAIN	TELENCEPHALON	CEREBRUM; CEREBRAL CORTEX
59	Area 24c of cortex	A24c	9.67122	1	FOREBRAIN	TELENCEPHALON	CEREBRUM; CEREBRAL CORTEX
60	Area 24d of cortex	A24d	5.99214	1	FOREBRAIN	TELENCEPHALON	CEREBRUM; CEREBRAL CORTEX
61	Area 25 of cortex	A25	8.4651	1	FOREBRAIN	TELENCEPHALON	CEREBRUM; CEREBRAL CORTEX
62	Area 29a-c of cortex	A29a-c	10.9528	1	FOREBRAIN	TELENCEPHALON	CEREBRUM; CEREBRAL CORTEX
63	Area 29d of cortex	A29d	5.74724	1	FOREBRAIN	TELENCEPHALON	CEREBRUM; CEREBRAL CORTEX
64	Area 30 of cortex	A30	9.84658	1	FOREBRAIN	TELENCEPHALON	CEREBRUM; CEREBRAL CORTEX
65	Area 31 of cortex	A31	5.98865	1	FOREBRAIN	TELENCEPHALON	CEREBRUM; CEREBRAL CORTEX
66	Area 32 of cortex	A32	11.711	1	FOREBRAIN	TELENCEPHALON	CEREBRUM; CEREBRAL CORTEX
67	Area 32 of cortex; ventral part	A32V	2.03854	0	FOREBRAIN	TELENCEPHALON	CEREBRUM; CEREBRAL CORTEX
68	Area 35 of cortex	A35	8.51975	1	FOREBRAIN	TELENCEPHALON	CEREBRUM; CEREBRAL CORTEX
69	Area 36 of cortex	A36	18.9919	2	FOREBRAIN	TELENCEPHALON	CEREBRUM; CEREBRAL CORTEX
70	Area 45 of cortex	A45	3.52342	0	FOREBRAIN	TELENCEPHALON	CEREBRUM; CEREBRAL CORTEX
71	Area 46 of cortex; dorsal part	A46D	2.23137	0	FOREBRAIN	TELENCEPHALON	CEREBRUM; CEREBRAL CORTEX
72	Area 46 of cortex; ventral part	A46V	2.29227	0	FOREBRAIN	TELENCEPHALON	CEREBRUM; CEREBRAL CORTEX
73	Area 47 (old 12) of cortex; lateral part	A47L	8.19573	1	FOREBRAIN	TELENCEPHALON	CEREBRUM; CEREBRAL CORTEX
74	Area 47 (old 12) of cortex; medial part	A47M	5.87954	1	FOREBRAIN	TELENCEPHALON	CEREBRUM; CEREBRAL CORTEX
75	Area 47 (old 12) of cortex; orbital part	A47O	4.66716	1	FOREBRAIN	TELENCEPHALON	CEREBRUM; CEREBRAL CORTEX
76	Auditory cortex; anterolateral area	AuAL	4.72291	1	FOREBRAIN	TELENCEPHALON	CEREBRUM; CEREBRAL CORTEX
77	Auditory cortex; caudolateral area	AuCL	3.28661	0	FOREBRAIN	TELENCEPHALON	CEREBRUM; CEREBRAL CORTEX
78	Auditory cortex; caudomedial area	AuCM	8.5801	1	FOREBRAIN	TELENCEPHALON	CEREBRUM; CEREBRAL CORTEX
79	Auditory cortex; caudal parabelt area	AuCPB	4.64232	1	FOREBRAIN	TELENCEPHALON	CEREBRUM; CEREBRAL CORTEX
80	Auditory cortex; middle lateral area	AuML	3.26674	0	FOREBRAIN	TELENCEPHALON	CEREBRUM; CEREBRAL CORTEX
81	Auditory cortex; primary area	AuA1	13.1632	2	FOREBRAIN	TELENCEPHALON	CEREBRUM; CEREBRAL CORTEX
82	Auditory cortex; rostral area	AuR	4.30302	1	FOREBRAIN	TELENCEPHALON	CEREBRUM; CEREBRAL CORTEX
83	Auditory cortex; rostral parabelt	AuRPB	5.9421	1	FOREBRAIN	TELENCEPHALON	CEREBRUM; CEREBRAL CORTEX
84	Auditory cortex; rostromedial area	AuRM	3.04557	0	FOREBRAIN	TELENCEPHALON	CEREBRUM; CEREBRAL CORTEX
85	Auditory cortex; rostrotemporal lateral area	AuRTL	3.35266	0	FOREBRAIN	TELENCEPHALON	CEREBRUM; CEREBRAL CORTEX
86	Auditory cortex; rostrotemporal medial area	AuRTM	3.70484	0	FOREBRAIN	TELENCEPHALON	CEREBRUM; CEREBRAL CORTEX
87	Auditory cortex; rostrotemporal part	AuRT	4.23586	1	FOREBRAIN	TELENCEPHALON	CEREBRUM; CEREBRAL CORTEX
88	Dysgranular insular cortex	DI	7.10847	1	FOREBRAIN	TELENCEPHALON	CEREBRUM; CEREBRAL CORTEX
89	Entorhinal cortex	Ent	29.7169	4	FOREBRAIN	TELENCEPHALON	CEREBRUM; CEREBRAL CORTEX
91	Fundus of superior temporal sulcus area of cortex	FST	14.1708	2	FOREBRAIN	TELENCEPHALON	CEREBRUM; CEREBRAL CORTEX
92	Granular insular cortex	GI	7.96352	1	FOREBRAIN	TELENCEPHALON	CEREBRUM; CEREBRAL CORTEX
93	Gustatory cortex	Gu	8.77919	1	FOREBRAIN	TELENCEPHALON	CEREBRUM; CEREBRAL CORTEX
94	Indusium griseum	IG	0.010856	0	FOREBRAIN	TELENCEPHALON	CEREBRUM; CEREBRAL CORTEX
95	Insular proisocortex	IPro	5.54926	1	FOREBRAIN	TELENCEPHALON	CEREBRUM; CEREBRAL CORTEX
96	Lateral intrapartietal area of cortex	LIP	15.5267	2	FOREBRAIN	TELENCEPHALON	CEREBRUM; CEREBRAL CORTEX
97	Medial intraparietal area of cortex	MIP	10.101	1	FOREBRAIN	TELENCEPHALON	CEREBRUM; CEREBRAL CORTEX
98	Medial superior temporal area of cortex	MST	8.71645	1	FOREBRAIN	TELENCEPHALON	CEREBRUM; CEREBRAL CORTEX
100	Occipito-parietal transitional area of cortex	OPt	10.7406	1	FOREBRAIN	TELENCEPHALON	CEREBRUM; CEREBRAL CORTEX
101	Orbital periallocortex	OPAl	2.78944	0	FOREBRAIN	TELENCEPHALON	CEREBRUM; CEREBRAL CORTEX
102	Orbital proisocortex	OPro	4.91685	1	FOREBRAIN	TELENCEPHALON	CEREBRUM; CEREBRAL CORTEX
103	Parainsular cortex; lateral part	PaIL	3.15082	0	FOREBRAIN	TELENCEPHALON	CEREBRUM; CEREBRAL CORTEX
104	Parainsular cortex; medial part	PaIM	4.2907	1	FOREBRAIN	TELENCEPHALON	CEREBRUM; CEREBRAL CORTEX
105	Parasubiculum	PaS	11.5329	1	FOREBRAIN	TELENCEPHALON	CEREBRUM; CEREBRAL CORTEX
106	Parietal area PE	PE	32.9292	4	FOREBRAIN	TELENCEPHALON	CEREBRUM; CEREBRAL CORTEX
107	Parietal area PE; caudal part	PEC	9.00974	1	FOREBRAIN	TELENCEPHALON	CEREBRUM; CEREBRAL CORTEX
108	Parietal area PF	PF	5.44198	1	FOREBRAIN	TELENCEPHALON	CEREBRUM; CEREBRAL CORTEX
109	Parietal area PFG	PFG	6.89706	1	FOREBRAIN	TELENCEPHALON	CEREBRUM; CEREBRAL CORTEX
110	Parietal area PG	PG	9.77261	1	FOREBRAIN	TELENCEPHALON	CEREBRUM; CEREBRAL CORTEX
111	Parietal areas PGa and IPa (fundus of superior temporal ventral area)	PGa/IPa	4.29382	1	FOREBRAIN	TELENCEPHALON	CEREBRUM; CEREBRAL CORTEX
112	Parietal area PG; medial part	PGM	9.52163	1	FOREBRAIN	TELENCEPHALON	CEREBRUM; CEREBRAL CORTEX
113	Piriform cortex	Pir	20.3005	3	FOREBRAIN	TELENCEPHALON	CEREBRUM; CEREBRAL CORTEX
117	Presubiculum	PrS	10.7458	1	FOREBRAIN	TELENCEPHALON	CEREBRUM; CEREBRAL CORTEX
118	Proisocortical motor region (precentral opercular cortex)	ProM	14.173	2	FOREBRAIN	TELENCEPHALON	CEREBRUM; CEREBRAL CORTEX
119	Prostriate area	ProSt	6.56917	1	FOREBRAIN	TELENCEPHALON	CEREBRUM; CEREBRAL CORTEX
121	Retroinsular area	ReI	3.30777	0	FOREBRAIN	TELENCEPHALON	CEREBRUM; CEREBRAL CORTEX
122	Secondary somatosensory cortex; external part	S2E	6.77433	1	FOREBRAIN	TELENCEPHALON	CEREBRUM; CEREBRAL CORTEX
123	Secondary somatosensory cortex; internal part	S2I	6.34598	1	FOREBRAIN	TELENCEPHALON	CEREBRUM; CEREBRAL CORTEX
124	Secondary somatosensory cortex; parietal rostral area	S2PR	3.68294	0	FOREBRAIN	TELENCEPHALON	CEREBRUM; CEREBRAL CORTEX
125	Secondary somatosensory cortex; parietal ventral area	S2PV	6.40007	1	FOREBRAIN	TELENCEPHALON	CEREBRUM; CEREBRAL CORTEX
126	Superior temporal rostral area	STR	17.209	2	FOREBRAIN	TELENCEPHALON	CEREBRUM; CEREBRAL CORTEX
128	Temporal area TE1	TE1	11.9146	1	FOREBRAIN	TELENCEPHALON	CEREBRUM; CEREBRAL CORTEX
129	Temporal area TE2	TE2	22.989	3	FOREBRAIN	TELENCEPHALON	CEREBRUM; CEREBRAL CORTEX
130	Temporal area TE3	TE3	42.9546	5	FOREBRAIN	TELENCEPHALON	CEREBRUM; CEREBRAL CORTEX
131	Temporal area TE; occipital part	TEO	23.5748	3	FOREBRAIN	TELENCEPHALON	CEREBRUM; CEREBRAL CORTEX
132	Temporal area TF	TF	19.5776	2	FOREBRAIN	TELENCEPHALON	CEREBRUM; CEREBRAL CORTEX
133	Temporal area TF; occipital part	TFO	7.70114	1	FOREBRAIN	TELENCEPHALON	CEREBRUM; CEREBRAL CORTEX
134	Temporal area TH	TH	10.6564	1	FOREBRAIN	TELENCEPHALON	CEREBRUM; CEREBRAL CORTEX
135	Temporal area TL	TL	4.51518	1	FOREBRAIN	TELENCEPHALON	CEREBRUM; CEREBRAL CORTEX
136	Temporal area TL; occipital part	TLO	7.76535	1	FOREBRAIN	TELENCEPHALON	CEREBRUM; CEREBRAL CORTEX
137	Temporal proisocortex	TPro	1.0959	0	FOREBRAIN	TELENCEPHALON	CEREBRUM; CEREBRAL CORTEX
138	Temporo-parieto-occipital association area (superior temporal polysensory cortex)	TPO	19.0446	2	FOREBRAIN	TELENCEPHALON	CEREBRUM; CEREBRAL CORTEX
139	Temporopolar proisocortex	TPPro	11.4093	1	FOREBRAIN	TELENCEPHALON	CEREBRUM; CEREBRAL CORTEX
140	Temporoparietal transitional area	TPt	4.60294	1	FOREBRAIN	TELENCEPHALON	CEREBRUM; CEREBRAL CORTEX
141	Ventral intraparietal area of cortex	VIP	3.36242	0	FOREBRAIN	TELENCEPHALON	CEREBRUM; CEREBRAL CORTEX
142	Visual area 1	V1	265.669	33	FOREBRAIN	TELENCEPHALON	CEREBRUM; CEREBRAL CORTEX
143	Visual area 2	V2	116.625	15	FOREBRAIN	TELENCEPHALON	CEREBRUM; CEREBRAL CORTEX
144	Visual area 3 (ventrolateral posterior area)	V3	61.4871	8	FOREBRAIN	TELENCEPHALON	CEREBRUM; CEREBRAL CORTEX
145	Visual area 3A (dorsoanterior area)	V3A	14.4784	2	FOREBRAIN	TELENCEPHALON	CEREBRUM; CEREBRAL CORTEX
146	Visual area 4 (ventrolatereral anterior area)	V4	30.9595	4	FOREBRAIN	TELENCEPHALON	CEREBRUM; CEREBRAL CORTEX
147	Visual area 4; transitional part	V4T	17.5231	2	FOREBRAIN	TELENCEPHALON	CEREBRUM; CEREBRAL CORTEX
148	Visual area 5 (middle temporal area)	V5	14.4098	2	FOREBRAIN	TELENCEPHALON	CEREBRUM; CEREBRAL CORTEX
149	Visual area 6 (dorsomedial area)	V6	36.8107	5	FOREBRAIN	TELENCEPHALON	CEREBRUM; CEREBRAL CORTEX
150	Visual area 6A (posterior parietal medial area)	V6A	10.3908	1	FOREBRAIN	TELENCEPHALON	CEREBRUM; CEREBRAL CORTEX
151	Hippocampal formation	HipF	118.529	15	FOREBRAIN	TELENCEPHALON
169	Amygdalopiriform transition area	Apir	2.13385	0	FOREBRAIN	TELENCEPHALON	BASAL GANGLIA
172	Central amygdaloid nucleus	Ce	3.50134	0	FOREBRAIN	TELENCEPHALON	BASAL GANGLIA
178	Anterior cortical amygdaloid nucleus	ACo	0.63756	0	FOREBRAIN	TELENCEPHALON	BASAL GANGLIA
179	Nucleus of the lateral olfactry tract	LOT	0.785128	0	FOREBRAIN	TELENCEPHALON	BASAL GANGLIA
180	Posterior cortical amygdaloid nucleus	PCo	2.02805	0	FOREBRAIN	TELENCEPHALON	BASAL GANGLIA
181	Medial amygdaloid nucleus	Me	0.749616	0	FOREBRAIN	TELENCEPHALON	BASAL GANGLIA
185	Bed nucleus of the stria terminalis	ST	5.94578	1	FOREBRAIN	TELENCEPHALON	BASAL GANGLIA
197	Basolateral amygdaloid nucleus	BL	9.45705	1	FOREBRAIN	TELENCEPHALON	BASAL GANGLIA
205	Basomedial amygdaloid nucleus; magnocellular part	BMMC	3.2073	0	FOREBRAIN	TELENCEPHALON	BASAL GANGLIA
206	Basomedial amygdaloid nucleus; parvicellular part	BMPC	3.97366	0	FOREBRAIN	TELENCEPHALON	BASAL GANGLIA
209	Lateral amygdaloid nucleus	La	5.97209	1	FOREBRAIN	TELENCEPHALON	BASAL GANGLIA
212	Claustrum	Cl	10.8577	1	FOREBRAIN	TELENCEPHALON	BASAL GANGLIA
213	Dorsal nucleus of the endopiriform claustrum	DEn	3.34862	0	FOREBRAIN	TELENCEPHALON	BASAL GANGLIA
215	External globus pallidus	EGP	11.7815	1	FOREBRAIN	TELENCEPHALON	BASAL GANGLIA
216	Internal globus pallidus	IGP	3.19645	0	FOREBRAIN	TELENCEPHALON	BASAL GANGLIA
217	Intermediate endopiriform nucleus	IEn	0.975752	0	FOREBRAIN	TELENCEPHALON	BASAL GANGLIA
220	Substantia nigra; compact part	SNC	1.70145	0	FOREBRAIN	TELENCEPHALON	BASAL GANGLIA
224	Substantia nigra; lateral part	SNL	1.77965	0	FOREBRAIN	TELENCEPHALON	BASAL GANGLIA
225	Substantia nigra; reticular part	SNR	3.48128	0	FOREBRAIN	TELENCEPHALON	BASAL GANGLIA
228	Accumbens nucleus; core	AcbC	4.52898	1	FOREBRAIN	TELENCEPHALON	BASAL GANGLIA
229	Accumbens nucleus; shell	AcbSh	9.61492	1	FOREBRAIN	TELENCEPHALON	BASAL GANGLIA
233	Caudate nucleus	Cd	81.5113	10	FOREBRAIN	TELENCEPHALON	BASAL GANGLIA
234	Putamen	Pu	49.1672	6	FOREBRAIN	TELENCEPHALON	BASAL GANGLIA
235	Subthalamic nucleus	STh	1.1511	0	FOREBRAIN	TELENCEPHALON	BASAL GANGLIA
236	Ventral nucleus of the endopiriform claustrum	VEn	1.80412	0	FOREBRAIN	TELENCEPHALON	BASAL GANGLIA
239	Nucleus of the horizontal limb of the diagonal band	HDB	0.544272	0	FOREBRAIN	TELENCEPHALON	SEPTUM
240	Nucleus of the vertical limb of the diagonal band	VDB	0.473616	0	FOREBRAIN	TELENCEPHALON	SEPTUM
243	Lateral septal nuclei	LS	7.51033	1	FOREBRAIN	TELENCEPHALON	SEPTUM
247	Medial septal nucleus	MS	1.6008	0	FOREBRAIN	TELENCEPHALON	SEPTUM
249	Septofimbrial nucleus	SFi	0.119048	0	FOREBRAIN	TELENCEPHALON	SEPTUM
255	Medial geniculate nucleus	MG	5.06258	1	FOREBRAIN	DIENCEPHALON	THALAMUS
261	Anterodorsal thalamic nucleus	AD	0.24012	0	FOREBRAIN	DIENCEPHALON	THALAMUS
262	Anteromedial thalamic nucleus	AM	1.23096	0	FOREBRAIN	DIENCEPHALON	THALAMUS
263	Anteroventral thalamic nucleus	AV	2.54049	0	FOREBRAIN	DIENCEPHALON	THALAMUS
265	Laterodorsal thalamic nucleus	LD	2.38722	0	FOREBRAIN	DIENCEPHALON	THALAMUS
266	Lateral posterior thalamic nucleus	LP	0.202952	0	FOREBRAIN	DIENCEPHALON	THALAMUS
267	Mediodorsal thalamic nucleus	MD	10.9307	1	FOREBRAIN	DIENCEPHALON	THALAMUS
271	Paratenial nucleus	PT	0.210312	0	FOREBRAIN	DIENCEPHALON	THALAMUS
273	Anterior pulvinar	APul	0.544456	0	FOREBRAIN	DIENCEPHALON	THALAMUS
274	Inferior pulvinar	IPul	5.41825	1	FOREBRAIN	DIENCEPHALON	THALAMUS
279	Lateral pulvinar	LPul	8.92087	1	FOREBRAIN	DIENCEPHALON	THALAMUS
280	Medial pulvinar	MPul	15.0308	2	FOREBRAIN	DIENCEPHALON	THALAMUS
282	Angular thalamic nucleus	Ang	0.741888	0	FOREBRAIN	DIENCEPHALON	THALAMUS
298	Ventral anterior thalamic nucleus	VA	11.0297	1	FOREBRAIN	DIENCEPHALON	THALAMUS
303	Ventral lateral thalamic nucleus; lateral part	VLLa	7.37656	1	FOREBRAIN	DIENCEPHALON	THALAMUS
304	Ventral lateral thalamic nucleus; medial part	VLM	2.65622	0	FOREBRAIN	DIENCEPHALON	THALAMUS
305	Ventrolateral thalamic nucleus; dorsal part	VLD	1.25801	0	FOREBRAIN	DIENCEPHALON	THALAMUS
308	Posterior thalamic nuclear group	Po	2.18997	0	FOREBRAIN	DIENCEPHALON	THALAMUS
311	Suprageniculate thalamic nucleus	SG	1.13307	0	FOREBRAIN	DIENCEPHALON	THALAMUS
316	Ventral posterolateral thalamic nucleus	VPL	2.1263	0	FOREBRAIN	DIENCEPHALON	THALAMUS
317	Ventral posteromedial thalamic nucleus	VPM	1.94948	0	FOREBRAIN	DIENCEPHALON	THALAMUS
320	Reticular nucleus	Rt	5.99766	1	FOREBRAIN	DIENCEPHALON	THALAMUS
325	Zona incerta	ZI	1.23942	0	FOREBRAIN	DIENCEPHALON	THALAMUS
331	Dorsal lateral geniculate nucleus	DLG	13.1694	2	FOREBRAIN	DIENCEPHALON	THALAMUS
342	Habenular nucleus	Hb	1.24421	0	FOREBRAIN	DIENCEPHALON	EPITHALAMUS
345	Paraventricular thalamic nucleus	PV	0.679696	0	FOREBRAIN	DIENCEPHALON	EPITHALAMUS
352	Arcuate hypothalamic nucleus	Arc	0.722568	0	FOREBRAIN	DIENCEPHALON	HYPOTHALAMUS
356	Dorsomedial hypothalamic nucleus	DM	1.17484	0	FOREBRAIN	DIENCEPHALON	HYPOTHALAMUS
364	Medial mammillary nucleus; medial part	MM	0.958272	0	FOREBRAIN	DIENCEPHALON	HYPOTHALAMUS
365	Medial tuberal nucleus	MTu	0.257784	0	FOREBRAIN	DIENCEPHALON	HYPOTHALAMUS
367	Paraventricular hypothalamic nucleus	Pa	0.264776	0	FOREBRAIN	DIENCEPHALON	HYPOTHALAMUS
377	Lateral preoptic area	LPO	0.739312	0	FOREBRAIN	DIENCEPHALON	HYPOTHALAMUS
379	Medial preoptic nucleus	MPO	2.12354	0	FOREBRAIN	DIENCEPHALON	HYPOTHALAMUS
384	Supraoptic nucleus	SO	0.187128	0	FOREBRAIN	DIENCEPHALON	HYPOTHALAMUS
388	Ventromedial hypothalamic nucleus	VMH	3.54899	0	FOREBRAIN	DIENCEPHALON	HYPOTHALAMUS
391	Anterior pretectal nucleus	APT	0.508024	0	FOREBRAIN	DIENCEPHALON	PRETECTUM
393	Medial pretectal area	MPT	0.443992	0	FOREBRAIN	DIENCEPHALON	PRETECTUM
394	Nucleus of the optic tract	OT	0.203504	0	FOREBRAIN	DIENCEPHALON	PRETECTUM
402	Nucleus of Darkschewitsch	Dk	0.093104	0	BRAIN STEM	MIDBRAIN
406	Central nucleus of the inferior colliculus	CIC	2.3138	0	BRAIN STEM	MIDBRAIN	Inferior colliculus
407	Dorsal cortex of the inferior colliculus	DCIC	2.46818	0	BRAIN STEM	MIDBRAIN	Inferior colliculus
408	External cortex of the inferior colliculus	ECIC	3.50005	0	BRAIN STEM	MIDBRAIN	Inferior colliculus
409	Interstitial nucleus of Cajal	InC	0.279864	0	BRAIN STEM	MIDBRAIN
417	Mesencephalic trigeminal nucleus	Me5	0.50508	0	BRAIN STEM	MIDBRAIN
418	Nucleus of the brachium of the inferior colliculus	BIC	1.13418	0	BRAIN STEM	MIDBRAIN
420	Occulomotor nucleus	3N	0.884304	0	BRAIN STEM	MIDBRAIN
435	Red nucleus	R	0.972256	0	BRAIN STEM	MIDBRAIN	Red nucleus
453	Deep gray layer of the superior colliculus	DpG	4.59595	1	BRAIN STEM	MIDBRAIN	Superior colliculus
455	Intermediate gray layer of the superior colliculus	InG	8.34274	1	BRAIN STEM	MIDBRAIN	Superior colliculus
458	Superficial gray layer of the superior colliculcus	SuG	3.28606	0	BRAIN STEM	MIDBRAIN	Superior colliculus
462	Trochlear nucleus	4N	0.19688	0	BRAIN STEM	MIDBRAIN
467	Abducens nucleus	6N	0.814936	0	BRAIN STEM	PONS
473	Dorsal cochlear nucleus	DC	0.959928	0	BRAIN STEM	PONS	Cochlear nuclei
475	Ventral cochlear nucleus; anterior part	VCA	0.575184	0	BRAIN STEM	PONS	Cochlear nuclei
476	Ventral cochlear nucleus; posterior part	VCP	1.43299	0	BRAIN STEM	PONS	Cochlear nuclei
477	Dorsal nucleus of the lateral lemniscus	DLL	0.11868	0	BRAIN STEM	PONS
479	Facial nucleus	7N	0.613456	0	BRAIN STEM	PONS
481	Intermediate nucleus of the lateral lemniscus	ILL	0.999304	0	BRAIN STEM	PONS
482	Locus coeruleus	LC	0.294216	0	BRAIN STEM	PONS
498	Motor trigeminal nucleus	5N	0.386952	0	BRAIN STEM	PONS
503	Nucleus of the spinal trigeminal tract	Sp5	6.1318	1	BRAIN STEM	PONS
504	Nucleus of the trapezoid body	Tz	0.259808	0	BRAIN STEM	PONS
505	Parabigeminal nucleus	PBG	0.07084	0	BRAIN STEM	PONS
509	Pontine nuclei	Pn	7.6785	1	BRAIN STEM	PONS
511	Principal sensory trigeminal nucleus	Pr5	0.670312	0	BRAIN STEM	PONS	Principal sensory trigeminal nucleus
526	Reticulotegmental nucleus of the pons	RtTg	3.06066	0	BRAIN STEM	PONS	Reticular formation
530	Sagulum nucleus	Sag	0.014352	0	BRAIN STEM	PONS
536	Lateral superior olive	LSO	0.1564	0	BRAIN STEM	PONS	Superior olive
538	Medial superior olive	MSO	0.09568	0	BRAIN STEM	PONS	Superior olive
543	Ventral nucleus of the lateral lemniscus	VLL	0.323656	0	BRAIN STEM	PONS
548	Ambiguus nucleus	Amb	0.100648	0	BRAIN STEM	MEDULLA OBLONGATA	Ambiguus nucleus
553	Cuneate nucleus	Cu	2.23045	0	BRAIN STEM	MEDULLA OBLONGATA
556	External cuneate nucleus	ECu	1.21918	0	BRAIN STEM	MEDULLA OBLONGATA
557	Gracile nucleus	Gr	2.29319	0	BRAIN STEM	MEDULLA OBLONGATA
558	Hypoglossal nucleus	12N	0.609224	0	BRAIN STEM	MEDULLA OBLONGATA
561	Inferior olive; beta subnucleus of the medial nucleus	IOBe	0.114632	0	BRAIN STEM	MEDULLA OBLONGATA	Inferior olive
562	Inferior olive; cap of Kooy of the medial nucleus	IOK	0.064216	0	BRAIN STEM	MEDULLA OBLONGATA	Inferior olive
563	Inferior olive; dorsal nucleus	IOD	0.095312	0	BRAIN STEM	MEDULLA OBLONGATA	Inferior olive
564	Inferior olive; medial nucleus	IOM	0.331936	0	BRAIN STEM	MEDULLA OBLONGATA	Inferior olive
565	Inferior olive; principal nucleus	IOPr	0.298264	0	BRAIN STEM	MEDULLA OBLONGATA	Inferior olive
589	Prepositus nucleus	Pr	0.625232	0	BRAIN STEM	MEDULLA OBLONGATA	Prepositus nucleus
602	Lateral reticular nucleus	LRt	2.20046	0	BRAIN STEM	MEDULLA OBLONGATA	Reticular formation
612	Solitary nucleus	Sol	2.01535	0	BRAIN STEM	MEDULLA OBLONGATA	Solitary nucleus
625	Lateral vestibular nucleus	LVe	1.22029	0	BRAIN STEM	MEDULLA OBLONGATA	Vestibular nuclei
626	Medial vestibular nucleus	MVe	4.80571	1	BRAIN STEM	MEDULLA OBLONGATA	Vestibular nuclei
630	Spinal vestibular nucleus	SpVe	2.48474	0	BRAIN STEM	MEDULLA OBLONGATA	Vestibular nuclei
631	Superior vestibular nucleus	SuVe	1.0247	0	BRAIN STEM	MEDULLA OBLONGATA	Vestibular nuclei
632	Vagus nerve nucleus	10N	0.184736	0	BRAIN STEM	MEDULLA OBLONGATA
653	Anterior interposed cerebellar nucleus	IntA	1.29076	0	CEREBELLUM	Deep cerebellar nuclei
654	Lateral (dentate) cerebellar nucleus	Lat	1.85122	0	CEREBELLUM	Deep cerebellar nuclei
656	Medial cerebellar nucleus	Med	0.954408	0	CEREBELLUM	Deep cerebellar nuclei
657	Posterior interposed cerebellar nucleus	IntP	0.819536	0	CEREBELLUM	Deep cerebellar nuclei
				255
